# Supplementary material for: Localized regional environmental risk in mountainous urban areas of Southwest China: identification, assessment, and management strategies in Kunming
Source: Royal Society of Chemistry journal article supplement (doi:10.1039/d4em00449c), 2024-09-02
Supplement: d4em00449c1.pdf [file d4em00449c1.pdf]

## **Supporting information**

### **Localized Regional Environmental Risk in Mountainous Urban Areas of Southwest China: Identification, Assessment, and Management Strategies in Kunming**

Wei Jin <sup>a,b</sup>, Qianwen Mo <sup>b</sup>, Guihong Li <sup>b</sup>, Gang Wang <sup>a</sup>, Binqiang Zhu <sup>b</sup>, Xing Wan <sup>a</sup>,  
Peng Lin <sup>b</sup>, Bin Huang <sup>a\*</sup>, Xuejun Pan <sup>a\*</sup>

\* Corresponding authors: [huangbin@kust.edu.cn](mailto:huangbin@kust.edu.cn) (Bin Huang), [xjpan@kust.edu.cn](mailto:xjpan@kust.edu.cn)  
(Xuejun Pan)

<sup>a</sup> Faculty of Environmental Science and Engineering, Kunming University of Science  
and Technology, Kunming 650500, China

<sup>b</sup> Kunming Ecological Environmental Engineering Assessment Center, Kunming  
650200, China

**Fig. S1. Identified hotspots areas in Kunming in 2022. The color gradient represents the intensity of environmental risks, with darker blue color indicating higher risk levels and lighter red color indicating lower risk levels.**

**Fig. S2. Distribution of (a) water and (b) atmospheric environmental risk index in Kunming in 2022.**

**Fig. S3. Correlations of population density, GDP, industrial output, and comprehensive environmental risk index ( $R_C$ ).**

**Table S1 Identification of environmental risk source intensity index (S).**

**Table S2 Identification of vulnerability index (V).**

**Table S3 Identification of management capability index (M).**

**Table S4 Identified 136 key regulated enterprises.**

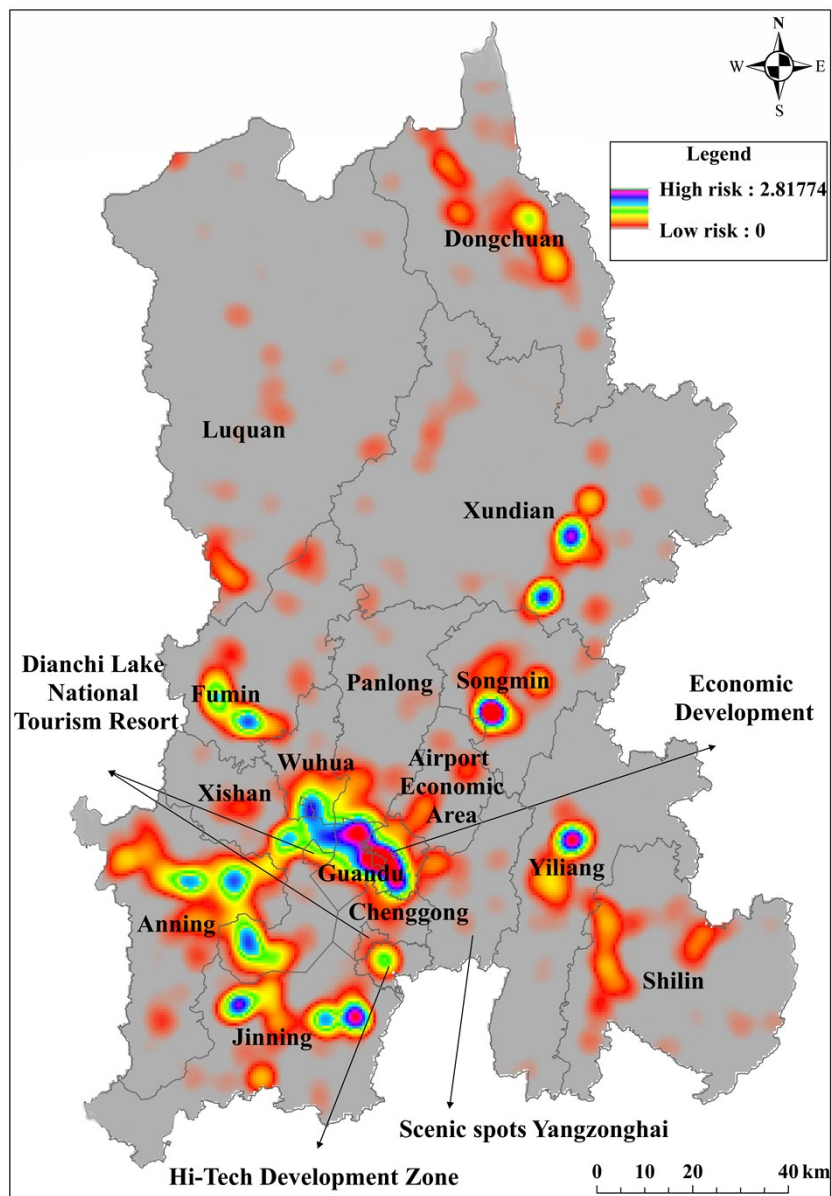

Fig. S1. Distribution of identified hotspots areas in Kunming in 2022. The color gradient represents the intensity of environmental risks, with darker blue color indicating higher risk levels and lighter red color indicating lower risk levels.

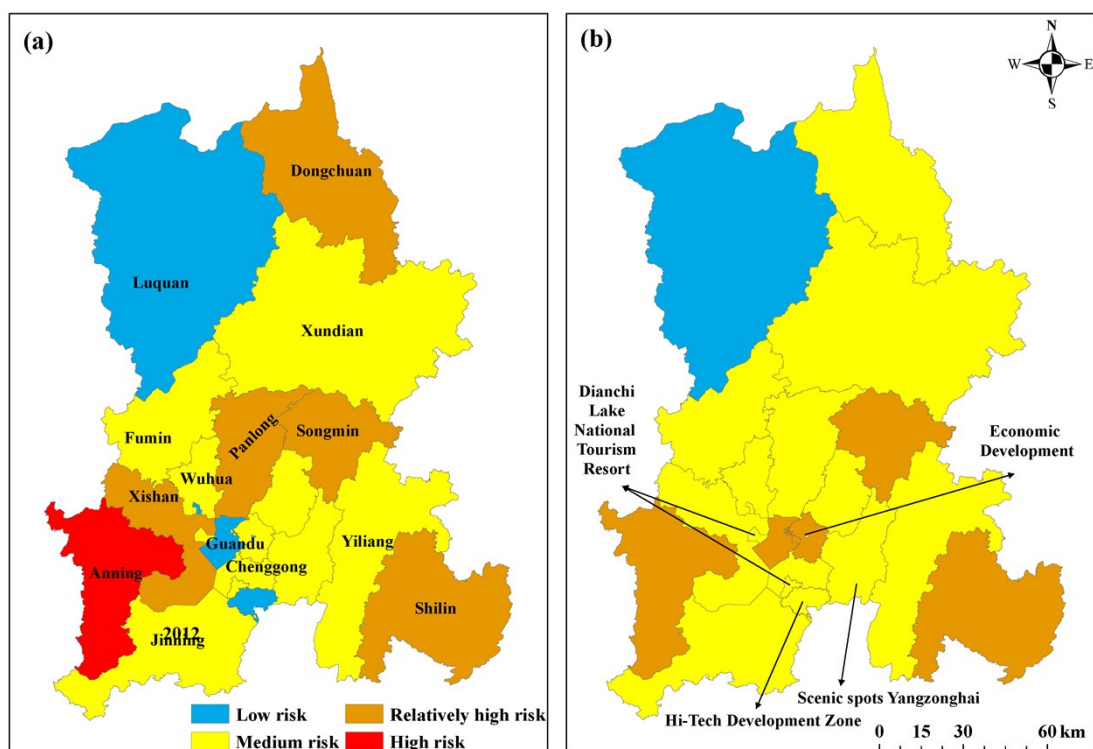

Fig. S2. Distribution of (a) water and (b) atmospheric environmental risk index in Kunming in

2022.

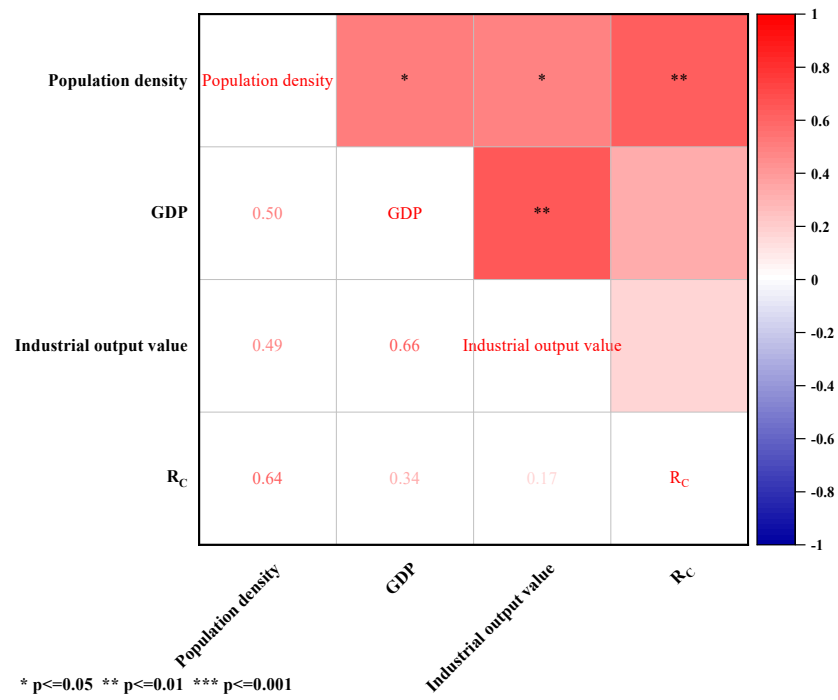

Fig. S3. Correlations of population density, GDP, industrial output, and comprehensive environmental risk index ( $R_C$ ).

Table S1 Identification of environmental risk source intensity index (S).

| Evaluation indicators                                                                          | Data sources                                    | Water environmental risk source intensity index ( $S_W$ ) |       | Atmospheric environmental risk source intensity index ( $S_A$ ) |       | Comprehensive environmental risk source intensity index ( $S_C$ ) |       |
|------------------------------------------------------------------------------------------------|-------------------------------------------------|-----------------------------------------------------------|-------|-----------------------------------------------------------------|-------|-------------------------------------------------------------------|-------|
|                                                                                                |                                                 | Distribution                                              | Value | Distribution                                                    | Value | Distribution                                                      | Value |
| Number of environmental risk enterprises per unit area                                         | Environmental                                   | > 0.5                                                     | 12    | > 0.5                                                           | 15    | > 1                                                               | 12    |
|                                                                                                | Protection Department,                          | (0.05-0.5]                                                | 9     | (0.05-0.5]                                                      | 11    | (0.1-1]                                                           | 9     |
|                                                                                                | enterprise                                      | (0.005-0.05]                                              | 5     | (0.005-0.05]                                                    | 6     | (0.01-0.1]                                                        | 5     |
|                                                                                                | environmental risk assessment report            | [0-0.005]                                                 | 0     | [0-0.005]                                                       | 0     | [0-0.01]                                                          | 0     |
| The ratio of the stock of environmental risk substances per unit area to the critical quantity | Environmental                                   | > 50                                                      | 12    | > 50                                                            | 15    | > 100                                                             | 12    |
|                                                                                                | Protection Department,                          | (25, 50]                                                  | 5     | (25, 50]                                                        | 8     | (50, 100]                                                         | 5     |
|                                                                                                | enterprise environmental risk assessment report | $\leq 25$                                                 | 0     | $\leq 25$                                                       | 0     | $\leq 50$                                                         | 0     |
| The percentage of enterprises with relatively high environmental risks                         | Environmental                                   | > 50                                                      | 11    | > 50                                                            | 10    | > 65                                                              | 11    |
|                                                                                                | Protection Department,                          | (20-50]                                                   | 7     | (20-50]                                                         | 6     | (30-65]                                                           | 7     |
|                                                                                                | enterprise                                      | (10-20]                                                   | 4     | (10-20]                                                         | 2     | (15-30]                                                           | 4     |
|                                                                                                | environmental risk assessment report            | $\leq 10$                                                 | 0     | $\leq 10$                                                       | 0     | $\leq 15$                                                         | 0     |
| Annual transportation of hazardous chemicals by road                                           | The Ministry of Communication                   | > 300                                                     | 20    | > 300                                                           | 25    | > 300                                                             | 20    |
|                                                                                                |                                                 | (30, 300]                                                 | 12    | (30, 300]                                                       | 15    | (30, 300]                                                         | 12    |
|                                                                                                |                                                 | (3, 30]                                                   | 4     | (3, 30]                                                         | 5     | (3, 30]                                                           | 4     |
|                                                                                                |                                                 | $\leq 3$                                                  | 0     | $\leq 3$                                                        | 0     | $\leq 3$                                                          | 0     |
| Number of tailings                                                                             | Ministry of                                     | $\geq 3$                                                  | 10    | /                                                               | /     | > 5                                                               | 10    |

|                                                                                        |                                      |                                                                                                                                               |    |                                                                                                                                     |    |                                                                                                                                                |    |
|----------------------------------------------------------------------------------------|--------------------------------------|-----------------------------------------------------------------------------------------------------------------------------------------------|----|-------------------------------------------------------------------------------------------------------------------------------------|----|------------------------------------------------------------------------------------------------------------------------------------------------|----|
| ponds with relatively high environmental risk levels and above                         | Environmental Protection             | 2                                                                                                                                             | 6  |                                                                                                                                     |    | [3-5]                                                                                                                                          | 6  |
|                                                                                        |                                      | 1                                                                                                                                             | 2  |                                                                                                                                     |    | [1-2]                                                                                                                                          | 2  |
|                                                                                        |                                      | 0                                                                                                                                             | 0  |                                                                                                                                     |    | 0                                                                                                                                              | 0  |
| Cross regional situation of oil, natural gas, and finished oil long-distance pipelines | Safety Supervision Department        | Crossing Class I and Class II surface water environmental functional zones and protection targets                                             | 10 | Crossing densely populated areas                                                                                                    | 10 | Crossing Class I and Class II surface water environmental functional zones and protection targets or population concentration areas            | 10 |
|                                                                                        |                                      | Crossing Class III and IV surface water environmental functional zones and protection targets                                                 | 6  | Not crossing population concentration areas                                                                                         | 2  | Crossing Class III and IV surface water environmental functional zones and protection targets                                                  | 6  |
|                                                                                        |                                      | Crossing Class V and Inferior Class V Surface water environmental functional zones and protection objectives                                  | 2  |                                                                                                                                     |    | Crossing Class V and inferior Class V surface water environmental functional zones and protection objectives                                   | 2  |
| The number and impact of sudden environmental incidents in the past five years         | Ministry of Environmental Protection | The number of sudden water environmental incidents is $\geq 1$ , and the number of sudden water environmental incidents with larger or higher | 25 | The number of sudden atmospheric environmental incidents is $\geq 1$ , and the number of sudden atmospheric environmental incidents | 25 | The number of sudden environmental incidents is $\geq 2$ , and the number of major and higher-level sudden environmental incidents is $\geq 1$ | 15 |

|                                    |                                      |                                                                                                                                              |    |                                                                                                                                                          |    |                                                                                                                                  |    |
|------------------------------------|--------------------------------------|----------------------------------------------------------------------------------------------------------------------------------------------|----|----------------------------------------------------------------------------------------------------------------------------------------------------------|----|----------------------------------------------------------------------------------------------------------------------------------|----|
|                                    |                                      | levels is $\geq 1$                                                                                                                           |    | with larger or higher levels is $\geq 1$                                                                                                                 |    |                                                                                                                                  |    |
|                                    |                                      | The number of sudden water environmental incidents is $\geq 1$ , and there are no major or higher-level sudden water environmental incidents | 13 | The number of sudden atmospheric environmental incidents is $\geq 1$ , and there are no major or higher-level sudden atmospheric environmental incidents | 13 | The number of sudden environmental incidents is $\geq 1$ , and there are no major or higher-level sudden environmental incidents | 8  |
|                                    |                                      | No sudden water environmental incidents occur                                                                                                | 0  | No sudden atmospheric environmental incidents occur                                                                                                      | 0  | No sudden environmental incidents occurred                                                                                       | 0  |
| Number of environmental complaints | Ministry of Environmental Protection | /                                                                                                                                            | /  | /                                                                                                                                                        | /  | > 300                                                                                                                            | 10 |
|                                    |                                      |                                                                                                                                              | /  | /                                                                                                                                                        | /  | [201, 300]                                                                                                                       | 7  |
|                                    |                                      |                                                                                                                                              | /  | /                                                                                                                                                        | /  | [100, 200]                                                                                                                       | 4  |
|                                    |                                      |                                                                                                                                              | /  | /                                                                                                                                                        | /  | < 100                                                                                                                            | 0  |

Note: The table has removed the characteristic environmental risk source indicators mentioned in the risk assessment index system for sudden environmental events, and the weights of the removed indicators have been distributed to other indicators at the same level as this indicator.



Table S2 Identification of vulnerability index (V).

| Evaluation indicators                                                          | Water environmental risk receptor vulnerability (V <sub>W</sub> ) |       | Atmospheric environmental risk receptor vulnerability (V <sub>A</sub> ) |       | Comprehensive environmental risk receptor vulnerability (V <sub>W</sub> ) |       |
|--------------------------------------------------------------------------------|-------------------------------------------------------------------|-------|-------------------------------------------------------------------------|-------|---------------------------------------------------------------------------|-------|
|                                                                                | Distribution                                                      | Value | Distribution                                                            | Value | Distribution                                                              | Value |
| Water quality categories of important water circulation channels               | Class I and II                                                    | 15    | /                                                                       | /     | Class I and II                                                            | 10    |
|                                                                                | Class III and IV                                                  | 7     |                                                                         |       | Class III and IV                                                          | 5     |
|                                                                                | Class V, inferior                                                 | 0     |                                                                         |       | Class V, inferior Class                                                   | 0     |
|                                                                                | Class V                                                           |       |                                                                         |       | V                                                                         |       |
| Water network density index                                                    | > 50                                                              | 15    | /                                                                       | /     | > 50                                                                      | 10    |
|                                                                                | (25, 50]                                                          | 7     |                                                                         |       | (25, 50]                                                                  | 5     |
|                                                                                | [0, 25]                                                           | 0     |                                                                         |       | [0, 25]                                                                   | 0     |
| Pollution wind frequency in residential areas                                  | /                                                                 | /     | > 20%                                                                   | 40    | > 20%                                                                     | 10    |
|                                                                                |                                                                   |       | (13%-20%]                                                               | 26    | (13%-20%]                                                                 | 7     |
|                                                                                |                                                                   |       | [5%-13%]                                                                | 13    | [5%-13%]                                                                  | 4     |
|                                                                                |                                                                   |       | < 5%                                                                    | 0     | < 5%                                                                      | 0     |
| Number of permanent residents per unit area (person/km <sup>2</sup> )          | /                                                                 | /     | /                                                                       | /     | > 1500                                                                    | 10    |
|                                                                                |                                                                   |       |                                                                         |       | (1000, 1500]                                                              | 7     |
|                                                                                |                                                                   |       |                                                                         |       | [500, 1000]                                                               | 4     |
|                                                                                |                                                                   |       |                                                                         |       | < 500                                                                     | 0     |
| Number of environmental risk receptors per unit area (number/km <sup>2</sup> ) | ≥ 0.5                                                             | 15    | ≥ 0.5                                                                   | 40    | ≥ 0.5                                                                     | 20    |
|                                                                                | [0.1-0.5)                                                         | 10    | [0.1-0.5)                                                               | 26    | [0.1-0.5)                                                                 | 14    |
|                                                                                | [0.01-0.1)                                                        | 5     | [0.01-0.1)                                                              | 13    | [0.01-0.1)                                                                | 8     |
|                                                                                | < 0.01                                                            | 0     | < 0.01                                                                  | 0     | < 0.01                                                                    | 0     |
| Number of centralized                                                          | > 10                                                              | 15    | /                                                                       | /     | > 10                                                                      | 10    |

|                                                                                                |         |    |         |    |           |    |
|------------------------------------------------------------------------------------------------|---------|----|---------|----|-----------|----|
| drinking water sources in townships and above                                                  | [5, 10] | 10 |         |    | [5, 10]   | 7  |
|                                                                                                | [1, 4]  | 5  |         |    | [1, 4]    | 4  |
|                                                                                                | 0       | 0  |         |    | 0         | 0  |
| Number of populations served by centralized drinking water source areas in townships and above | > 10    | 20 |         |    | > 100     | 10 |
|                                                                                                | [7, 10] | 14 | /       | /  | [50, 100] | 7  |
|                                                                                                | [3, 7)  | 8  |         |    | [30, 50)  | 4  |
|                                                                                                | < 3     | 0  |         |    | < 30      | 0  |
| Per capita GDP level                                                                           | < 3     | 20 | < 3     | 20 | < 3       | 20 |
|                                                                                                | [3, 5)  | 14 | [3, 5)  | 14 | [3, 5)    | 14 |
|                                                                                                | [5, 10) | 8  | [5, 10) | 8  | [5, 10)   | 8  |
|                                                                                                | ≥ 10    | 0  | ≥ 10    | 0  | ≥ 10      | 0  |

Table S3 Identification of management capability index (M).

| Evaluation indicators          | Data sources                         | Water environmental risk management capability (M <sub>W</sub> )                    |       | Atmospheric environmental risk management capability (M <sub>A</sub> )                                                                                         |       | Comprehensive environmental risk management capability (M <sub>C</sub> )                                                                                                                                                             |       |
|--------------------------------|--------------------------------------|-------------------------------------------------------------------------------------|-------|----------------------------------------------------------------------------------------------------------------------------------------------------------------|-------|--------------------------------------------------------------------------------------------------------------------------------------------------------------------------------------------------------------------------------------|-------|
|                                |                                      | Distribution                                                                        | Value | Distribution                                                                                                                                                   | Value | Distribution                                                                                                                                                                                                                         | Value |
| Monitoring and warning ability | Ministry of Environmental Protection | No emergency monitoring or environmental quality monitoring points have been set up | 20    | Less than 50% of enterprises with environmental risks related to toxic and harmful gases install toxic and harmful gas warning devices                         | 20    | No water environment emergency monitoring points have been set up, and less than 50% of enterprises involved in toxic and harmful gas environmental risks install toxic and harmful gas warning devices                              | 20    |
|                                |                                      | Only set up environmental quality monitoring points                                 | 10    | More than 50% and less than 80% of enterprises with environmental risks related to toxic and harmful gases shall install toxic and harmful gas warning devices | 10    | Emergency monitoring points for water environment have been set up, and toxic and harmful gas warning devices have been installed in enterprises with environmental risks related to toxic and harmful gases ranging from 50% to 80% | 10    |
|                                |                                      | Set up emergency monitoring and environmental quality monitoring points             | 0     | More than 80% of enterprises with environmental risks related to toxic and harmful gases install toxic and harmful gas warning devices                         | 0     | Emergency monitoring points for water environment have been set up, and over 80% of enterprises with environmental risks related to toxic and harmful gases have installed toxic and harmful gas warning devices                     | 0     |
| The                            | Government                           | Inadequate interception,                                                            | 20    | /                                                                                                                                                              | /     | Inadequate interception, diversion,                                                                                                                                                                                                  | 20    |

|                                                                 |                                    |                                                                                                                        |    |                                                                                                                        |    |                                                                                                                                                                         |    |
|-----------------------------------------------------------------|------------------------------------|------------------------------------------------------------------------------------------------------------------------|----|------------------------------------------------------------------------------------------------------------------------|----|-------------------------------------------------------------------------------------------------------------------------------------------------------------------------|----|
| interception, dilution, and disposal capabilities of pollutants | Emergency Departments              | diversion, dilution, and physicochemical processing capabilities                                                       |    |                                                                                                                        |    | dilution, and physicochemical processing capabilities                                                                                                                   |    |
|                                                                 |                                    | Possess one of the capabilities in interception, diversion, dilution, and physicochemical treatment                    | 10 |                                                                                                                        |    | Possess one of the capabilities in interception, diversion, dilution, and physicochemical treatment                                                                     | 10 |
|                                                                 |                                    | Possess two of the capabilities in interception, diversion, dilution, and physicochemical treatment                    | 0  |                                                                                                                        |    | Possess two of the capabilities in interception, diversion, dilution, and physicochemical treatment                                                                     | 0  |
|                                                                 |                                    |                                                                                                                        |    |                                                                                                                        |    |                                                                                                                                                                         |    |
| Preparation status of environmental emergency plans             | Government Emergency Departments   | No special emergency plan, and no relevant content in the department and plan                                          | 15 | No special emergency plan, and no relevant content in the department and plan                                          | 20 | Have no special emergency plan in place                                                                                                                                 | 10 |
|                                                                 |                                    | No special emergency plan, but have relevant content in the department's emergency plan or government's emergency plan | 8  | No special emergency plan, but have relevant content in the department's emergency plan or government's emergency plan | 10 | Have only one government emergency plan or departmental emergency plan                                                                                                  | 5  |
|                                                                 |                                    | Have a special emergency plan in place                                                                                 | 0  | Have a special emergency plan in place                                                                                 | 0  | Have a special emergency plan in place                                                                                                                                  | 0  |
|                                                                 |                                    |                                                                                                                        |    |                                                                                                                        |    |                                                                                                                                                                         |    |
| Environmental emergency decision-making support                 | Environmental Emergency Department | /                                                                                                                      | /  | /                                                                                                                      | /  | No specialized environmental emergency agency or department has been established, and no emergency expert group for sudden environmental incidents has been established | 15 |

|                                             |                                    |                                                                                                                                                           |    |                                                                                                                                                                          |    |                                                                                                                                                           |    |   |
|---------------------------------------------|------------------------------------|-----------------------------------------------------------------------------------------------------------------------------------------------------------|----|--------------------------------------------------------------------------------------------------------------------------------------------------------------------------|----|-----------------------------------------------------------------------------------------------------------------------------------------------------------|----|---|
|                                             |                                    |                                                                                                                                                           |    | Environmental emergency specialized agencies or departments have been established, but no emergency expert group for sudden environmental incidents has been established |    |                                                                                                                                                           |    | 7 |
|                                             |                                    |                                                                                                                                                           |    | Environmental emergency specialized agencies or departments have been established, and an emergency expert group for sudden environmental incidents has been established |    |                                                                                                                                                           |    | 0 |
| Number of environmental emergency personnel | Environmental Emergency Department | Not meeting the standards                                                                                                                                 | 15 | Not meeting the standards                                                                                                                                                | 20 | Not meeting the standards                                                                                                                                 | 10 |   |
|                                             |                                    | Level 3                                                                                                                                                   | 6  | Level 3                                                                                                                                                                  | 8  | Level 3                                                                                                                                                   | 4  |   |
|                                             |                                    | Level 2                                                                                                                                                   | 3  | Level 2                                                                                                                                                                  | 4  | Level 2                                                                                                                                                   | 2  |   |
|                                             |                                    | Level 1                                                                                                                                                   | 0  | Level 1                                                                                                                                                                  | 0  | Level 1                                                                                                                                                   | 0  |   |
| Emergency material reserves                 | Environmental Emergency Department | Local materials cannot meet the emergency needs of the event, and there is no information on material reserves in other regions                           | 15 | Local materials cannot meet the emergency needs of the event, and there is no information on material reserves in other regions                                          | 20 | Local materials cannot meet the emergency needs of the event, and there is no information on material reserves in other regions                           | 15 |   |
|                                             |                                    | Local materials cannot meet the emergency needs of the event, but there is information on the reserve of materials in other regions that can be called up | 7  | Local materials cannot meet the emergency needs of the event, but there is information on the reserve of materials in other regions that can be called up                | 10 | Local materials cannot meet the emergency needs of the event, but there is information on the reserve of materials in other regions that can be called up | 7  |   |

|                                               |                                     | Local materials basically meet the emergency needs of the event and do not need to be called from other areas | 0  | Local materials basically meet the emergency needs of the event and do not need to be called from other areas | 0  | Local materials basically meet the emergency needs of the event and do not need to be called from other areas | 0  |
|-----------------------------------------------|-------------------------------------|---------------------------------------------------------------------------------------------------------------|----|---------------------------------------------------------------------------------------------------------------|----|---------------------------------------------------------------------------------------------------------------|----|
| Environmental emergency monitoring capability | Environmental Monitoring Department | Not meeting the standards                                                                                     | 15 | Not meeting the standards                                                                                     | 20 | Not meeting the standards                                                                                     | 10 |
|                                               |                                     | Level 3                                                                                                       | 6  | Level 3                                                                                                       | 8  | Level 3                                                                                                       | 5  |
|                                               |                                     | Level 2                                                                                                       | 3  | Level 2                                                                                                       | 4  | Level 2                                                                                                       | 2  |
|                                               |                                     | Level 1                                                                                                       | 0  | Level 1                                                                                                       | 0  | Level 1                                                                                                       | 0  |

Table S4 Identified 136 key regulated enterprises.

| Administrative area | Number | Enterprises                                                                                                                              |
|---------------------|--------|------------------------------------------------------------------------------------------------------------------------------------------|
| Wuhua               | 4      | Yunnan Copper Co., LTD. Southwest copper branch                                                                                          |
|                     |        | Yunnan Cloud copper and zinc industry Co., LTD                                                                                           |
|                     |        | Fumin salary metallurgy industry and trade Co., Ltd. Wuhua branch                                                                        |
|                     |        | Kunming Pharmaceutical Group Co., LTD                                                                                                    |
| Panlong             | 1      | Kunming acetate fiber Co., LTD                                                                                                           |
| Guandu              | 2      | Kundong oil Depot, Kunming Petroleum Branch, China                                                                                       |
|                     |        | Petrochemical Sales Co., LTD                                                                                                             |
|                     |        | Yangfangwa oil storage depot, Yunnan Petroleum Co., LTD., China Aviation Oil Group                                                       |
| Xishan              | 23     | Yunnan petrochina Kunlun Gas Co., LTD. Kunming West Branch (Xishan)                                                                      |
|                     |        | Yunnan Yuntianhua fluorine chemical Co., LTD                                                                                             |
|                     |        | Yunnan Tianyao Chemical Co., LTD                                                                                                         |
|                     |        | Kunming Shenghong new material manufacturing Co., LTD                                                                                    |
|                     |        | Kunming Hewei Dongli Fuel Co., LTD                                                                                                       |
|                     |        | Tianchi logistics limited liability company Haikou branch                                                                                |
|                     |        | Yunnan Shengwei Chemical Co., LTD                                                                                                        |
|                     |        | Yunnan phosphating Group Haikou phosphorus industry Co., LTD                                                                             |
|                     |        | Kunming Yunpanshan Phosphorus chemical Co., LTD                                                                                          |
|                     |        | Yunnan Weng Fu Yun Tianhua fluorine chemical Technology Co., LTD                                                                         |
|                     |        | Yunnan third ring chemical fertilizer Co., LTD                                                                                           |
|                     |        | Yunnan Baker Gini Tianchuang phosphate Co., LTD                                                                                          |
|                     |        | Yunnan Sanhuan Xinsheng fertilizer Co., LTD                                                                                              |
|                     |        | Yunnan Zhengbang technology Co., LTD                                                                                                     |
|                     |        | Kunming Tongda phosphorus industry Co., LTD                                                                                              |
|                     |        | Zhongguang Yilan (Group) Co., LTD                                                                                                        |
|                     |        | Yunnan Xinzhengda Phosphorus Chemical Co., LTD                                                                                           |
|                     |        | China National Petroleum and Natural Gas Pipeline Network Group Co., LTD. South China Branch Yunnan Oil Transmission Division 1 (Xishan) |

|           |    |                                                                                            |
|-----------|----|--------------------------------------------------------------------------------------------|
| Dongchuan | 6  | Kunming Fengde environmental protection electric power Co., LTD                            |
|           |    | Sinopec Sales Co., Ltd. Yunnan Kunming Chenggong gas station                               |
|           |    | Sinopec Sales Co., LTD. Kunming Chenggong Gas Station (B)                                  |
|           |    | Kunming Chuan Jin Nuo Chemical Co.,Ltd.                                                    |
|           |    | Yunnan red rich fertilizer Co., LTD                                                        |
|           |    | Kunming Xuxin environmental protection technology Co., LTD                                 |
|           |    | Kunming new Neidu non-ferrous metal Co., LTD                                               |
|           |    | Kunming Jinsida Technology Co., LTD                                                        |
|           |    | Yunnan Sanjing waterproof building materials Co., LTD                                      |
|           |    | Yunnan Ruilang Environmental Engineering Co., LTD                                          |
| Anning    | 26 | Yunnan Kaling environmental protection Engineering Co., LTD                                |
|           |    | Yunnan Xiangfeng Jinmai Chemical Co., LTD                                                  |
|           |    | Yunnan Tianan Chemical Co., LTD                                                            |
|           |    | Yunnan Yuntianhua Petrochemical Co., LTD                                                   |
|           |    | Kunming Yunneng Chemical Co., LTD                                                          |
|           |    | Yunnan Xiangfeng Petrochemical Co., LTD                                                    |
|           |    | Petrochina Yunnan Petrochemical Co., LTD                                                   |
|           |    | Wuhan Iron and Steel Group Kunming Iron and Steel Co., LTD. New branch                     |
|           |    | Yunnan Hongxiang Chemical Co., LTD                                                         |
|           |    | Yunnan energy Investment chemical Co., Ltd. Kunming company                                |
|           |    | Yunnan Coal energy Co., LTD. Anning branch                                                 |
|           |    | Yunnan Shanshi Chemical Co., LTD                                                           |
|           |    | Yunnan Anning Xingming chemical plant                                                      |
|           |    | Yunnan Kungang Jiahua cement building Materials Co., LTD                                   |
|           |    | Anning Yinzhou Chemical Co., LTD                                                           |
|           |    | Yunnan Sinopec High-speed Petroleum Co., LTD. Kunming Anning Shupu Gas Station (Station A) |
|           |    | Yunnan Sinopec High-speed Petroleum Co., LTD. Kunming Anning Shupu Gas Station (Station B) |
|           |    | Sinopec Sales Co., Ltd. Yunnan Kunming Changpo oil depot                                   |
|           |    | Kunming Iron and Steel Group limited liability company power energy branch                 |
|           |    | Anning city Hongyuan economic and trade co., Ltd. phosphating                              |



|         |    |                                                                   |
|---------|----|-------------------------------------------------------------------|
|         |    | factory                                                           |
|         |    | Polyfluoro (Kunming) Technology Development Co., LTD              |
|         |    | Kunming Huiquan high purity semiconducting material Co., LTD      |
|         |    | Anning Dyke Fine chemical Co., LTD                                |
|         |    | Yunnan Kaiyu photoelectric technology Co., LTD                    |
|         |    | Anning Yunzhou new building materials Co., LTD                    |
|         |    | China National Petroleum Company Limited Southwest pipeline       |
|         |    | Kunming oil and gas branch Anning first station                   |
|         |    | Yunnan Hongxiang Chemical Co., LTD. Anning City                   |
|         |    | Yuanbaoshan phosphate rock                                        |
|         |    | Yunnan Jinning yellow phosphorus Co., Ltd. second street branch   |
|         |    | Yunnan Yunda technology agrochemical Co., LTD                     |
|         |    | Kunming Wenfeng fertilizer manufacturing Co., LTD                 |
|         |    | Yunnan Zhongzheng Chemical Industry Co., LTD                      |
|         |    | Jinning oil depot of Yunnan Qianglin Petrochemical Group Co., LTD |
|         |    | Yunnan Xingkun Chemical Co., LTD                                  |
|         |    | Yunnan Zesen Environmental protection Technology Co., LTD         |
|         |    | Yunnan phosphating Group Co., LTD. Phosphorus chemical division   |
| Jinning | 18 | Kunming Hongteng Phosphorus chemical Co., LTD                     |
|         |    | Kunming Red Sea phosphate fertilizer Co., LTD                     |
|         |    | Yunnan Zhongmin Gas Co., LTD                                      |
|         |    | Yunnan Fuhui gas trade Co., LTD                                   |
|         |    | Yunnan Ning fluorine environmental protection technology Co., LTD |
|         |    | Yunnan Lilong Chemical Co., LTD                                   |
|         |    | Yunnan Haokun phosphorus Chemical Co., LTD                        |
|         |    | Yunnan tree fertilizer Co., LTD                                   |
|         |    | Budweiser (Kunming) Beer Co., LTD                                 |
|         |    | Kunming Fuhui environmental protection Technology Co., LTD        |
|         |    | Yunnan Dadi Fengyuan Environmental protection Co., LTD            |
| Fumin   | 11 | Fumin salary metallurgy industry and trade Co., LTD               |
|         |    | Fumin Zhongbo new materials Co., LTD                              |
|         |    | Fumin county Yunfu phosphate limited liability company            |

|         |    |                                                                                                                            |
|---------|----|----------------------------------------------------------------------------------------------------------------------------|
| Songmin | 11 | Yunnan great interworking titanium Co., LTD                                                                                |
|         |    | Fumin Jincheng Chemical Co., LTD                                                                                           |
|         |    | Fumin Longteng titanium industry limited liability company                                                                 |
|         |    | Yunnan Fumin Shixiang feed additive Co., LTD                                                                               |
|         |    | Yunnan Zechang titanium Co., LTD                                                                                           |
|         |    | Yunnan Xinlong mineral feed Co., LTD                                                                                       |
|         |    | Yunnan new Zexing wood-based panel Co., LTD                                                                                |
|         |    | Songming Junjie circuit equipment Co., LTD                                                                                 |
|         |    | Kunming Zichuang infrared technology Co., LTD                                                                              |
|         |    | Yunnan Bo Rui Biological Technology Co., LTD                                                                               |
|         |    | Kunming Guosong Special coating Co., LTD                                                                                   |
| Yiliang | 6  | Baic Yunnan Ruili Automobile Co., Ltd. Kunming branch                                                                      |
|         |    | Yunnan Tianchuang Technology Co., LTD                                                                                      |
|         |    | National expressway network G85 Chongqing to Kunming                                                                       |
|         |    | Expressway Songming (Xiaopu) to Kunming expressway project                                                                 |
|         |    | National Petroleum and Natural Gas Pipeline Network Group Co., LTD. South China branch of Yunnan oil transmission Division |
| Shilin  | 2  | Kunming East Branch line project of Yunnan petrochina Kunlun Gas Co., LTD                                                  |
|         |    | Songming Changsong Avenue gas station                                                                                      |
|         |    | Songming Changsong Avenue gas station                                                                                      |
|         |    | Kunming Dongsheng metallurgical chemical Co., LTD                                                                          |
|         |    | Yunnan Surui technology Co., LTD                                                                                           |
| Xundian | 11 | Yiliang Pengcheng liquefied gas Co., LTD                                                                                   |
|         |    | Yiliang Yaosheng trading Co., LTD                                                                                          |
|         |    | Kunming Hongli cement Co., LTD                                                                                             |
|         |    | Yiliang County Xingyun rice noodle processing plant                                                                        |
|         |    | Sinopec Sales Co., LTD. Kunming, Yunnan Shilin Dadiashui Gas Station (South Station)                                       |
|         |    | Yunnan Shilin Oil Co., LTD                                                                                                 |
|         |    | Yunnan Guoneng Chemical Co., LTD                                                                                           |
|         |    | Zhonghua Yunlong Co. LTD                                                                                                   |
|         |    | Yunnan South phosphorus Group electrochemical Co., LTD                                                                     |
|         |    | Yunnan Yunnan wood wood-based panel Co., LTD                                                                               |

|              |   |                                                                                                                                   |
|--------------|---|-----------------------------------------------------------------------------------------------------------------------------------|
|              |   | Yunnan Yalong aluminum Co., LTD                                                                                                   |
|              |   | Yunnan Evergreen tree Chemical Co., LTD                                                                                           |
|              |   | Yunnan Pioneer Chemical Co., LTD                                                                                                  |
|              |   | Yunnan Sinopec high-speed Petroleum Co., LTD Kunming                                                                              |
|              |   | Xundian Pansuohai gas Station Station A                                                                                           |
|              |   | Yunnan Sinopec high-speed Petroleum Co., LTD Kunming                                                                              |
|              |   | Xundian Pansuohai gas Station Station B                                                                                           |
|              |   | National Petroleum and Natural Gas Pipeline Network Group Co., LTD. South China Branch Yunnan Oil Transmission Division (Xundian) |
|              |   | Yunnan petrochina Kunlun Gas Co., LTD. Kunming East Branch (Xundian)                                                              |
| Luquan       | 1 | Yunnan Chuanyun health care food Co., LTD                                                                                         |
| Kunming      |   | Yunnan Shennong meat industry food Co., LTD                                                                                       |
| Economic     | 3 | Kunming North infrared Technology Co., LTD                                                                                        |
| Development  |   | Yunnan Chengda frozen food logistics Co., LTD                                                                                     |
| Kunming      |   | Kunming Jida Pharmaceutical Co., LTD                                                                                              |
| National     |   | Kunming cloud germanium high-tech Co., LTD                                                                                        |
| High-Tech    | 4 | Yunnan Seiko plate making Co., LTD                                                                                                |
| Industrial   |   | Kunming Aoshuo petrochemical Co., LTD                                                                                             |
| Development  |   |                                                                                                                                   |
| Kunming      |   | Yunnan Chaoguan Chemical Co., LTD                                                                                                 |
| Airport      | 3 | China Aviation Oil Co., LTD. Yunnan Company Kunming                                                                               |
| Economic     |   | Changshui Airport oil depot                                                                                                       |
| Area         |   | Petrochina Kunming Yangtian Chong oil depot                                                                                       |
|              |   | Yunnan cold cloud food and beverage Co., LTD                                                                                      |
| Kunming      |   | Yunnan Yuanxin carbon Co., Ltd. Yangzonghai branch                                                                                |
| scenic spots | 4 | Yunnan Sinopec high-speed Petroleum Co., LTD. Kunming                                                                             |
| Yangzonghai  |   | Yangzong Service area gas station (A) station                                                                                     |
|              |   | Yunnan Sinopec high-speed Petroleum Co., LTD. Kunming                                                                             |
|              |   | Yangzong Service area gas station (B) station                                                                                     |
